# Supplementary material
Source: PubMed Central journal article supplement (PMC8455706)
Supplement: NIHMS1685211-supplement-Edited_version_of_SDC.pdf [file NIHMS1685211-supplement-Edited_version_of_SDC.pdf]

## **Supplementary Material**

### **Search strategy**

Databases used to search for clinical trials included PubMed, Medline, Embase, ClinicalTrials.gov, and the EU Clinical trials register. Only human clinical studies of solid organ transplantation were included for further review.

These were further filtered for trials using dendritic cell, macrophage, or mesenchymal stem cells therapy. If studies were completed on a trials registry database, they were only included if published results were available. Incomplete, ongoing, or active studies were only included if their status was updated within the past 5 years.
