# Supplementary material
Source: PubMed Central journal article supplement (PMC8455706)
Supplement: NIHMS1685211-supplement-Supplementary_materials.pdf [file NIHMS1685211-supplement-Supplementary_materials.pdf]

## **Supplementary Materials**

Table 1 – 3 summarises the available human clinical trials studying adoptive cell transfer of either tolerogenic dendritic cells, regulatory macrophages or mesenchymal stem cells.

### **Search strategy**

Databases used to search for clinical trials included PubMed, Medline, Embase, ClinicalTrials.gov, EU Clinical trials register. Only human clinical studies of solid organ transplantation were included for further review.

These were further filtered for trials using dendritic cell, macrophage or mesenchymal stem cells therapy. If studies were completed on a trials registry database, they were only included if published results were available. Incomplete, ongoing or active studies were only included if their status was updated within the past 5 years.
